# Supplementary material for: Designed synthesis of anatase–TiO2 (B) biphase nanowire/ZnO nanoparticle heterojunction for enhanced photocatalysis
Source: Royal Society of Chemistry journal article supplement (doi:10.1039/c7ta10274g), 2018-01-01
Supplement: c7ta10274g1.pdf [file c7ta10274g1.pdf]

## Supporting Information

### **Designed synthesis of anatase-TiO<sub>2</sub> (B) biphase nanowires/ZnO nanoparticles heterojunction for enhanced photocatalysis**

Chaoyang Sun<sup>a</sup>, Qihua Xu<sup>a</sup>, Yu Xie<sup>a\*</sup>, Yun Ling<sup>a</sup>, Yang Hou<sup>b,c\*</sup>

<sup>a</sup>Nanchang Hangkong University, Department of Material Chemistry, Nanchang,  
Jiangxi Province, China

<sup>b</sup>Key Laboratory of Biomass Chemical Engineering of Ministry of Education,  
College of Chemical and Biological Engineering, Zhejiang University, Hangzhou  
310027, China

<sup>c</sup>Department of Chemistry and Food Chemistry & Center for Advancing Electronics,  
Dresden (CFAED), Technische Universität Dresden, 01062 Dresden, Germany

\*Corresponding authors:

Yu Xie, E-mail: xieyu\_121@163.com

Yang Hou, E-mail: yhou@zju.edu.cn

Fax: +86 791 83953373; Tel: +86 791 83953373

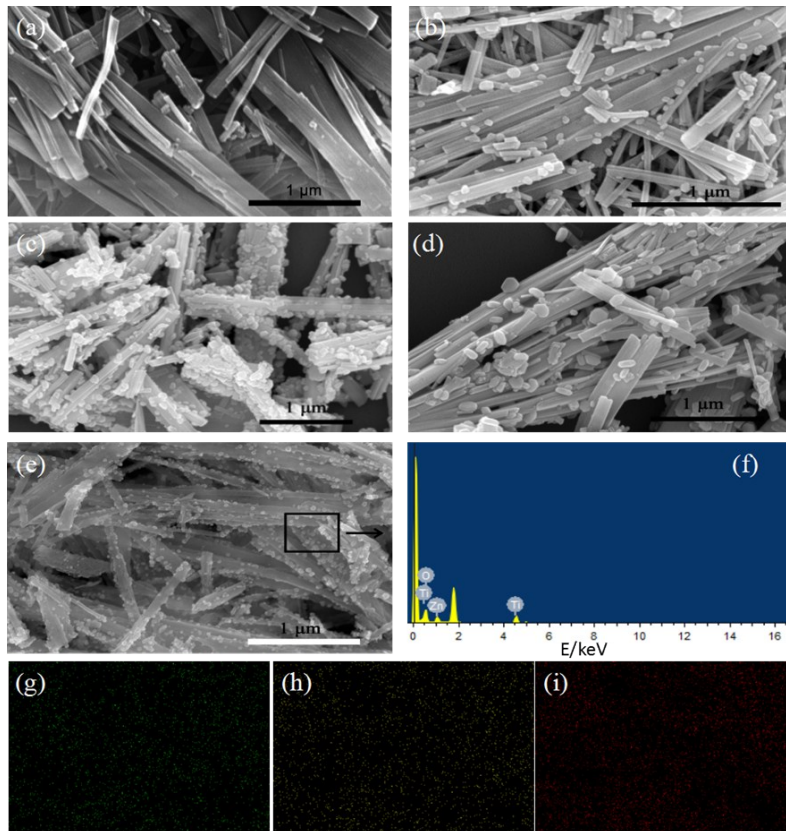

Figure S1. FESEM images of (a) TiO<sub>2</sub> NWs, (b) TiO<sub>2</sub>-ZnO-10, (c) TiO<sub>2</sub>-ZnO-30, (d) TiO<sub>2</sub>-ZnO-50, (e) TiO<sub>2</sub>-ZnO-20, and (f) the corresponding EDS spectrum of (e); EDS maps of (g) Ti element, (h) Zn element, (i) O element.

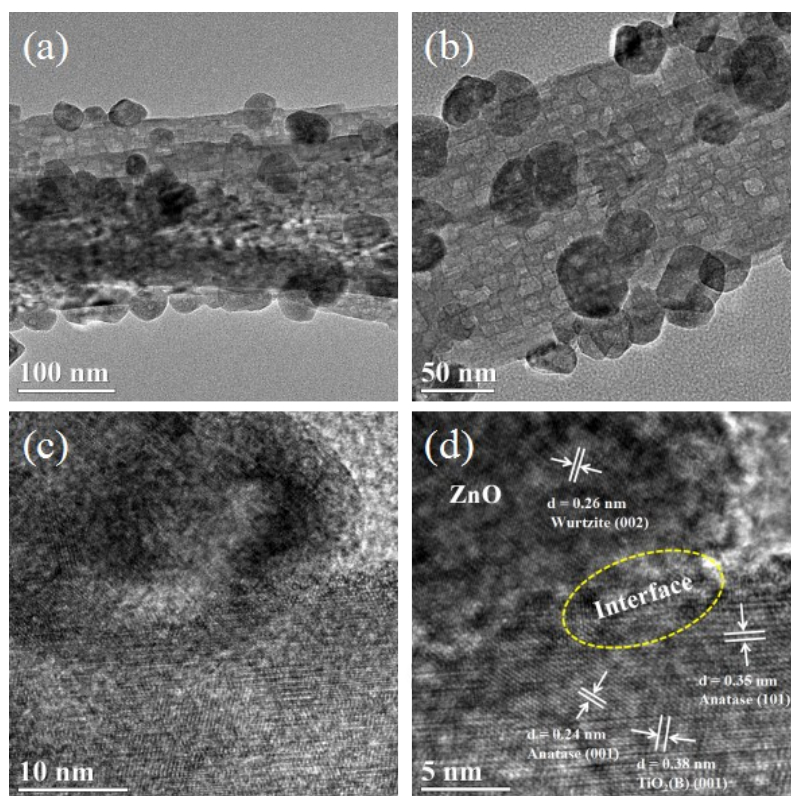

Figure S2. TEM and HRTEM images of the TiO<sub>2</sub>-ZnO-20: low magnification image TEM (a-b) and high magnification TEM image (c-d) images of the TiO<sub>2</sub>-ZnO-20.

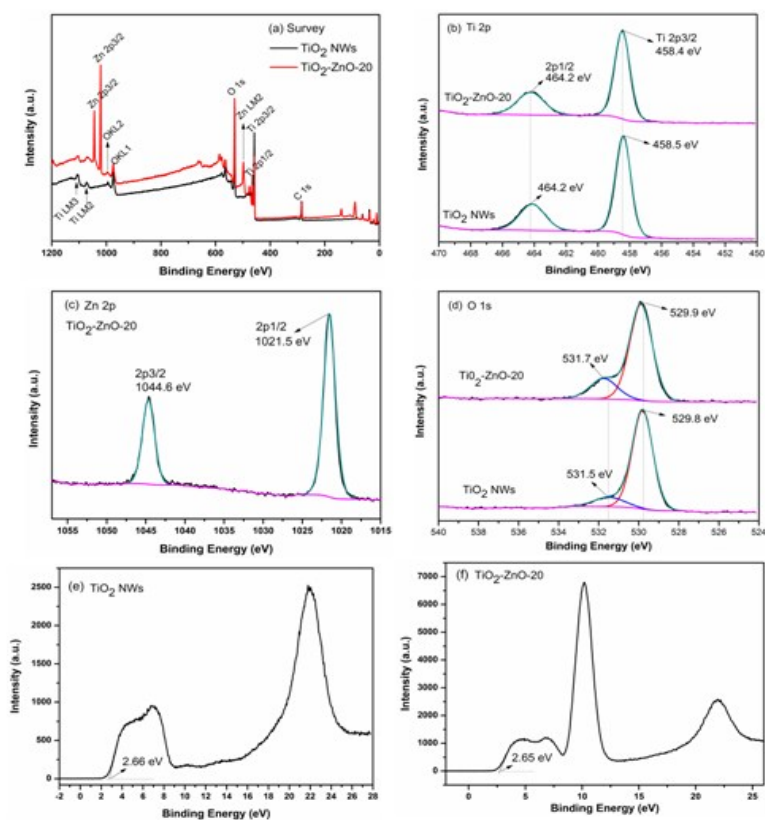

Figure S3. XPS spectra of TiO<sub>2</sub>-ZnO samples. (a) Survey of the samples; (b) Ti 2p; (c) Zn 2p; (d) O 1s; (e) VB XPS spectra of TiO<sub>2</sub> NWs; (f) VB XPS spectra of TiO<sub>2</sub>-ZnO-20.

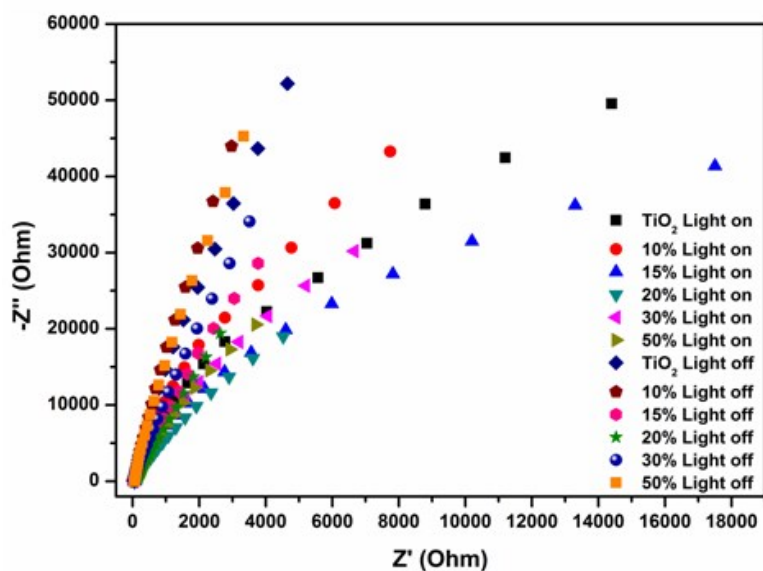

Figure S4. EIS spectra of TiO<sub>2</sub> NWs and TiO<sub>2</sub>-ZnO samples.

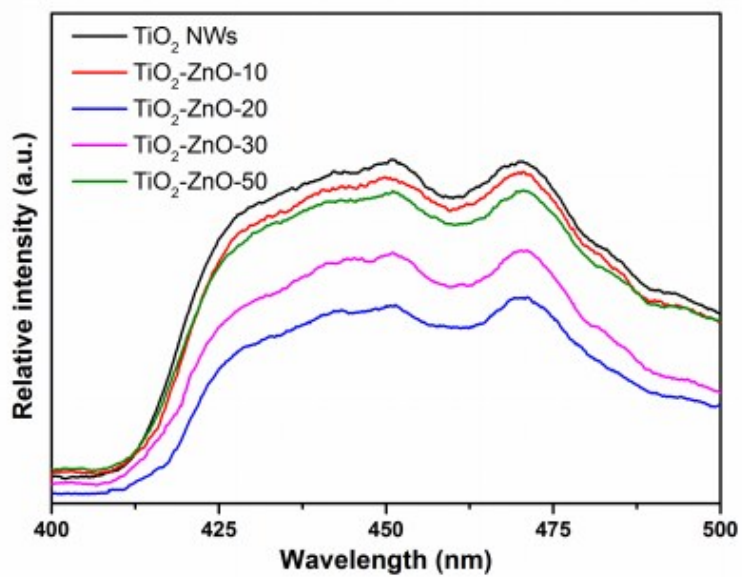

Figure S5. Photoluminescence spectra of TiO<sub>2</sub> NWs and TiO<sub>2</sub>-ZnO samples.

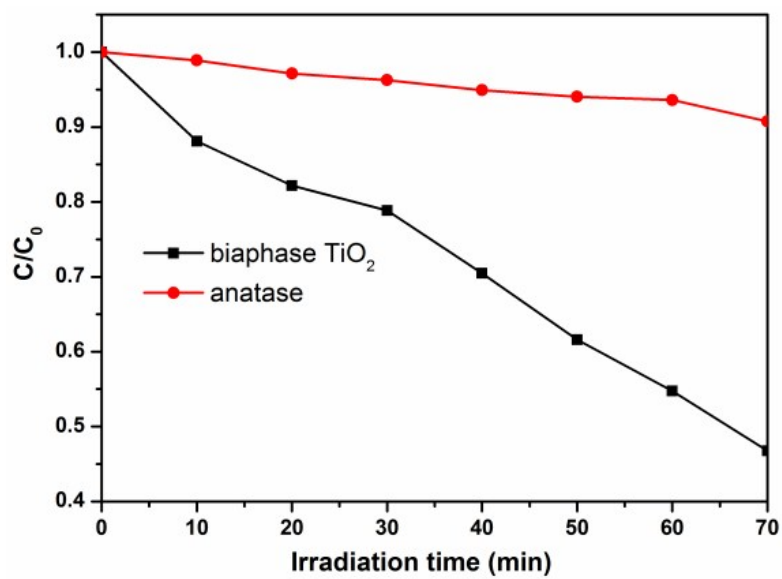

Figure S6. Photocatalytic degradation of MO in the presence of biphasic TiO<sub>2</sub> NWs and single anatase phase.

Table S1. The BET surface area, pore volume, and average pore diameter of TiO<sub>2</sub> NWs and TiO<sub>2</sub>-ZnO samples.

| Samples                  | BET specific surface area<br>(m <sup>2</sup> g <sup>-1</sup> ) | Pore volume<br>(cm <sup>3</sup> g <sup>-1</sup> ) | Average pore diameter<br>(nm) |
|--------------------------|----------------------------------------------------------------|---------------------------------------------------|-------------------------------|
| TiO <sub>2</sub> NWs     | 21.94                                                          | 0.094                                             | 17.08                         |
| TiO <sub>2</sub> -ZnO-20 | 23.29                                                          | 0.078                                             | 13.47                         |
| TiO <sub>2</sub> -ZnO-50 | 22.16                                                          | 0.079                                             | 14.28                         |

Table S2. Reaction rate constants of TiO<sub>2</sub> NWs, ZnO NPs, and TiO<sub>2</sub>-ZnO samples.

| Sample                    | TiO <sub>2</sub> NWs | ZnO NPs | TiO <sub>2</sub> -ZnO-10 | TiO <sub>2</sub> -ZnO-15 | TiO <sub>2</sub> -ZnO-20 | TiO <sub>2</sub> -ZnO-30 | TiO <sub>2</sub> -ZnO-50 |
|---------------------------|----------------------|---------|--------------------------|--------------------------|--------------------------|--------------------------|--------------------------|
| k<br>(min <sup>-1</sup> ) | 0.0099               | 0.0202  | 0.0079                   | 0.0352                   | 0.0420                   | 0.0116                   | 0.0091                   |

Table S3. Weight ratio of ZnO in the TiO<sub>2</sub>-ZnO samples calculated from ICP-MS.

| Sample    | TiO <sub>2</sub> -ZnO-10 | TiO <sub>2</sub> -ZnO-15 | TiO <sub>2</sub> -ZnO-20 | TiO <sub>2</sub> -ZnO-30 | TiO <sub>2</sub> -ZnO-50 |
|-----------|--------------------------|--------------------------|--------------------------|--------------------------|--------------------------|
| ZnO ratio | 8.38%                    | 11.15%                   | 15.12%                   | 20.35%                   | 24.28%                   |
